# Supplementary material for: Effect of Gd3+, La3+, Lu3+ Co-Doping on the Morphology and Luminescent Properties of NaYF4:Sm3+ Phosphors
Source: MDPI journal article supplement (doi:10.3390/ma16062157), 2023-03-07
Supplement: s1 [file s1]

# Effect of $\text{Gd}^{3+}$ , $\text{La}^{3+}$ , $\text{Lu}^{3+}$ Co-Doping on the Morphology and Luminescent Properties of $\text{NaYF}_4\text{:Sm}^{3+}$ Phosphors

Viktor G. Nosov <sup>1</sup>, Anna A. Betina <sup>1</sup>, Tatyana S. Bulatova <sup>1</sup>, Polina B. Guseva <sup>1</sup>, Ilya E. Kolesnikov <sup>1</sup>, Sergey N. Orlov <sup>1,2,3</sup>, Maxim S. Panov <sup>1,4</sup>, Mikhail N. Ryazantsev <sup>1,5</sup>, Nikita A. Bogachev <sup>1</sup>, Mikhail Yu Skripkin <sup>1,\*</sup> and Andrey S. Mereshchenko <sup>1,\*</sup>

<sup>1</sup> Saint-Petersburg State University, 7/9 Universitetskaya Emb., 199034 St. Petersburg, Russia

<sup>2</sup> Federal State Unitary Enterprise “Alexandrov Research Institute of Technology”, 72 Koporskoe Shosse, 188540 Sosnovy Bor, Russia

<sup>3</sup> Institute of Nuclear Industry, Peter the Great St. Petersburg Polytechnic University (SPbSU), 29, Polytechnicheskaya Street, 195251 St. Petersburg, Russia

<sup>4</sup> Center for Biophysical Studies, Saint Petersburg State Chemical Pharmaceutical University, 14 Professor Popov Str., Lit. A, 197022 St. Petersburg, Russia

<sup>5</sup> Nanotechnology Research and Education Centre RAS, Saint Petersburg Academic University, 8/3 Khlopina Street, 194021 St. Petersburg, Russia

\* Correspondence: skripkin1965@yandex.ru (M.Y.S.); a.mereshchenko@spbu.ru (A.S.M.); Tel.: +7-906-246-96-32 (M.Y.S.); +7-951-677-54-65 (A.S.M.)

**Citation:** Nosov, V.G.; Betina, A.A.; Bulatova, T.S.; Guseva, P.B.; Kolesnikov, I.E.; Orlov, S.N.; Panov, M.S.; Ryazantsev, M.N.; Bogachev, N.A.; Skripkin, M.Y.; et al. Effect of  $\text{Gd}^{3+}$ ,  $\text{La}^{3+}$ ,  $\text{Lu}^{3+}$  Co-Doping on the Morphology and Luminescent Properties of  $\text{NaYF}_4\text{:Sm}^{3+}$  Phosphors. *Materials* **2023**, *16*, 2157. <https://doi.org/10.3390/ma16062157>

Academic Editor: Valery V. Tuchin

Received: 11 February 2023

Revised: 3 March 2023

Accepted: 6 March 2023

Published: 7 March 2023

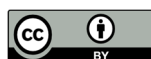

**Copyright:** © 2023 by the authors. Submitted for possible open access publication under the terms and conditions of the Creative Commons Attribution (CC BY) license (<https://creativecommons.org/licenses/by/4.0/>).

The supplementary materials contain unit cell parameters, refined from XRD patterns, pre-exponential constants, fitting lifetimes and average luminescence lifetimes of the synthesized samples.

**Table S1.** Unit cell parameters of the  $\text{NaY}_{(1-x)}\text{Sm}_x\text{F}_4$  samples.

| X ( $\text{Sm}^{3+}$ ) | a, Å      | c, Å      | V, Å <sup>3</sup> |
|------------------------|-----------|-----------|-------------------|
| 0                      | 5.9900(5) | 3.5268(3) | 109.589(19)       |
| 0.02                   | 5.9904(6) | 3.5281(4) | 109.64(2)         |
| 0.05                   | 5.9939(5) | 3.5325(3) | 109.91(2)         |
| 0.1                    | 5.9973(5) | 3.5368(3) | 110.17(2)         |
| 0.2                    | 6.0048(5) | 3.5469(3) | 110.76(2)         |
| 0.3                    | 6.0138(4) | 3.5583(3) | 111.447(17)       |
| 0.4                    | 6.0233(4) | 3.5704(3) | 112.178(18)       |
| 0.5                    | 6.0326(4) | 3.5839(3) | 112.953(19)       |

**Table S2.** Unit cell parameters of the  $\text{NaY}_{(0.98-x)}\text{Sm}_{0.02}\text{La}_x\text{F}_4$  samples.

| X ( $\text{La}^{3+}$ ) | a, Å        | c, Å        | V, Å <sup>3</sup> |
|------------------------|-------------|-------------|-------------------|
| 0.005                  | 5.9911(5)   | 3.5310(3)   | 109.756(19)       |
| 0.02                   | 5.9955(4)   | 3.5352(2)   | 110.050(17)       |
| 0.05                   | 6.00170(16) | 3.54401(19) | 110.554(8)        |
| 0.1                    | 6.0128(5)   | 3.5604(3)   | 111.47(2)         |
| 0.2                    | 6.0340(5)   | 3.5917(3)   | 113.25(2)         |
| 0.4                    |             |             |                   |
| 0.6                    |             |             |                   |

**Table S3.** Unit cell parameters of the  $\text{NaY}_{(0.98-x)}\text{Sm}_{0.02}\text{Gd}_x\text{F}_4$  samples.

| X ( $\text{Gd}^{3+}$ ) | a, Å      | c, Å      | V, Å <sup>3</sup> |
|------------------------|-----------|-----------|-------------------|
| 0.005                  | 5.9917(4) | 3.5290(3) | 109.719(17)       |
| 0.02                   | 5.9914(4) | 3.5290(3) | 109.708(18)       |
| 0.05                   | 5.9942(5) | 3.5320(3) | 109.902(19)       |
| 0.1                    | 5.9949(5) | 3.5360(3) | 110.05(2)         |
| 0.2                    | 6.0008(5) | 3.5424(3) | 110.47(2)         |
| 0.4                    | 6.0117(4) | 3.5571(2) | 111.333(17)       |
| 0.6                    | 6.0240(4) | 3.5734(2) | 112.299(16)       |

**Table S4.** Unit cell parameters of the  $\text{NaY}_{(0.98-x)}\text{Sm}_{0.02}\text{Lu}_x\text{F}_4$  samples.

| X ( $\text{Lu}^{3+}$ ) | a, Å        | c, Å        | V, Å <sup>3</sup> |
|------------------------|-------------|-------------|-------------------|
| 0.005                  | 5.9944(3)   | 3.52989(18) | 109.847(11)       |
| 0.02                   | 5.9951(3)   | 3.52818(17) | 109.819(11)       |
| 0.05                   | 5.9966(4)   | 3.5296(3)   | 109.918(17)       |
| 0.1                    | 5.9862(7)   | 3.5219(4)   | 109.30(3)         |
| 0.2                    | 5.98301(15) | 3.51629(10) | 109.007(6)        |
| 0.4                    | 5.97266(10) | 3.50358(6)  | 108.237(4)        |
| 0.6                    | 5.95889(9)  | 3.48396(5)  | 107.136(4)        |

**Table S5.** Pre-exponential constants, fitting lifetimes and average luminescence lifetimes of  $\text{NaY}_{(1-x)}\text{Sm}_x\text{F}_4$  powders.

| X ( $\text{Sm}^{3+}$ ) | t <sub>1</sub> , ms | A <sub>1</sub> | t <sub>2</sub> , ms | A <sub>2</sub> | t <sub>av</sub> , ms |
|------------------------|---------------------|----------------|---------------------|----------------|----------------------|
| 0.005                  | 0.49585             | 0.36133        | 4.52447             | 0.67952        | 4.30263              |
| 0.01                   | 0.69825             | 0.23256        | 4.44964             | 0.79106        | 4.28421              |
| 0.02                   | 0.58935             | 0.32768        | 3.7595              | 0.70596        | 3.54448              |
| 0.03                   | 0.60009             | 0.41627        | 3.538               | 0.62408        | 3.23940              |
| 0.05                   | 0.30837             | 0.49036        | 2.2279              | 0.59149        | 2.03031              |
| 0.1                    | 0.24629             | 0.78663        | 1.3877              | 0.36752        | 1.07347              |
| 0.2                    | 0.13878             | 1.10607        | 0.67055             | 0.24386        | 0.41307              |

**Table S6.** Pre-exponential constants, fitting lifetimes and average luminescence lifetimes of NaY<sub>(0.98-x)</sub>Sm<sub>0.02</sub>Gd<sub>x</sub>F<sub>4</sub> powders.

| X (Gd <sup>3+</sup> ) | t <sub>1</sub> , ms | A <sub>1</sub> | t <sub>2</sub> , ms | A <sub>2</sub> | t <sub>av</sub> , ms |
|-----------------------|---------------------|----------------|---------------------|----------------|----------------------|
| 0                     | 0.58935             | 0.32768        | 3.7595              | 0.70596        | 3.54448              |
| 0.0025                | 0.58007             | 0.34455        | 3.73643             | 0.69077        | 3.50958              |
| 0.005                 | 0.60648             | 0.34961        | 3.74336             | 0.68448        | 3.50362              |
| 0.01                  | 0.61335             | 0.35128        | 3.71315             | 0.68324        | 3.47050              |
| 0.07                  | 0.60558             | 0.35478        | 3.70736             | 0.67945        | 3.46359              |
| 0.6                   | 0.65792             | 0.32904        | 3.81826             | 0.70232        | 3.58219              |

**Table S7.** Pre-exponential constants, fitting lifetimes and average luminescence lifetimes of NaY<sub>(0.98-x)</sub>Sm<sub>0.02</sub>Lu<sub>x</sub>F<sub>4</sub> powders.

| X (Lu <sup>3+</sup> ) | t <sub>1</sub> , ms | A <sub>1</sub> | t <sub>2</sub> , ms | A <sub>2</sub> | t <sub>av</sub> , ms |
|-----------------------|---------------------|----------------|---------------------|----------------|----------------------|
| 0                     | 0.58935             | 0.32768        | 3.7595              | 0.70596        | 3.54448              |
| 0.0025                | 0.65557             | 0.3448         | 3.82723             | 0.68725        | 3.57623              |
| 0.005                 | 0.61999             | 0.36009        | 3.71785             | 0.67513        | 3.46482              |
| 0.01                  | 0.59521             | 0.3532         | 3.6604              | 0.68179        | 3.42225              |
| 0.07                  | 0.58935             | 0.34112        | 3.68533             | 0.69298        | 3.45940              |
| 0.6                   | 0.58524             | 0.34268        | 3.67685             | 0.69221        | 3.45103              |

**Table S8.** Pre-exponential constants, fitting lifetimes and average luminescence lifetimes of NaY<sub>(0.98-x)</sub>Sm<sub>0.02</sub>La<sub>x</sub>F<sub>4</sub> powders.

| X (La <sup>3+</sup> ) | t <sub>1</sub> , ms | A <sub>1</sub> | t <sub>2</sub> , ms | A <sub>2</sub> | t <sub>av</sub> , ms |
|-----------------------|---------------------|----------------|---------------------|----------------|----------------------|
| 0                     | 0.58935             | 0.32768        | 3.7595              | 0.70596        | 3.54448              |
| 0.0025                | 0.58503             | 0.34648        | 3.68518             | 0.68894        | 3.45597              |
| 0.005                 | 0.60215             | 0.33958        | 3.78063             | 0.69506        | 3.55115              |
| 0.01                  | 0.5846              | 0.34412        | 3.68805             | 0.69116        | 3.46104              |
| 0.07                  | 0.59006             | 0.3325         | 3.69152             | 0.70171        | 3.47315              |
| 0.6                   | 0.6829              | 0.3456         | 3.78738             | 0.68578        | 3.52878              |
